# Supplementary material for: Metabolome and Transcriptome Association Analysis Reveals Mechanism of Synthesis of Nutrient Composition in Quinoa (Chenopodium quinoa Willd.) Seeds
Source: MDPI journal article supplement (doi:10.3390/foods13091325), 2024-04-26
Supplement: s1 [file s1]

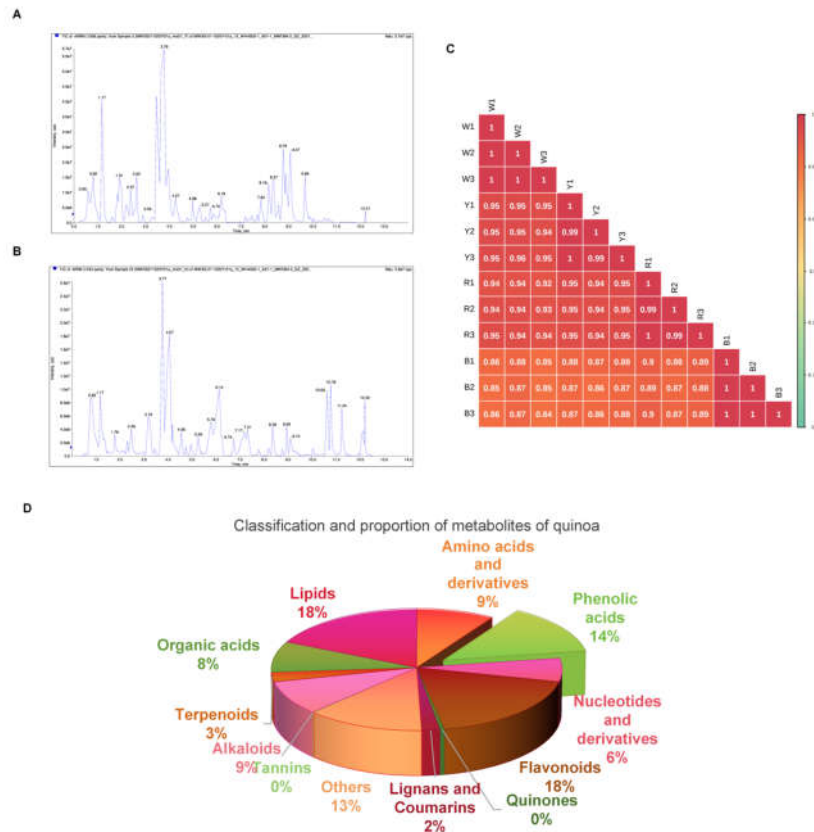

**Figure S1:** (A - D) (A-D) Total ion current (TIC) of QC samples in positive ion mode (A) and negative ion mode (B), the horizontal axis represents the retention time (Rt) for metabolite detection, while the vertical axis denotes the ion current intensity measured in counts per second (cps). (C) Pearson correlation coefficients of black, red, white and yellow quality control samples, the vertical and diagonal lines on the graph indicate the sample names for various samples, with different colors signifying different Pearson correlation coefficients. A deeper shade of red indicates a stronger positive correlation, while a prevalence of green suggests a weaker correlation. Conversely, a richer blue hue denotes a stronger negative correlation. Additionally, the correlation coefficients between pairs of samples are displayed within the grid. The "correlation\_expt" denotes the repeated correlation assessments conducted on the experimental test samples, whereas "correlation\_mix" refers to the repeated correlation evaluations carried out on the quality

control (QC) samples. Classification and proportion of metabolites of different quinoa seeds(D).

设置了格式: 字体: 10.5 磅, 字体颜色: 红色

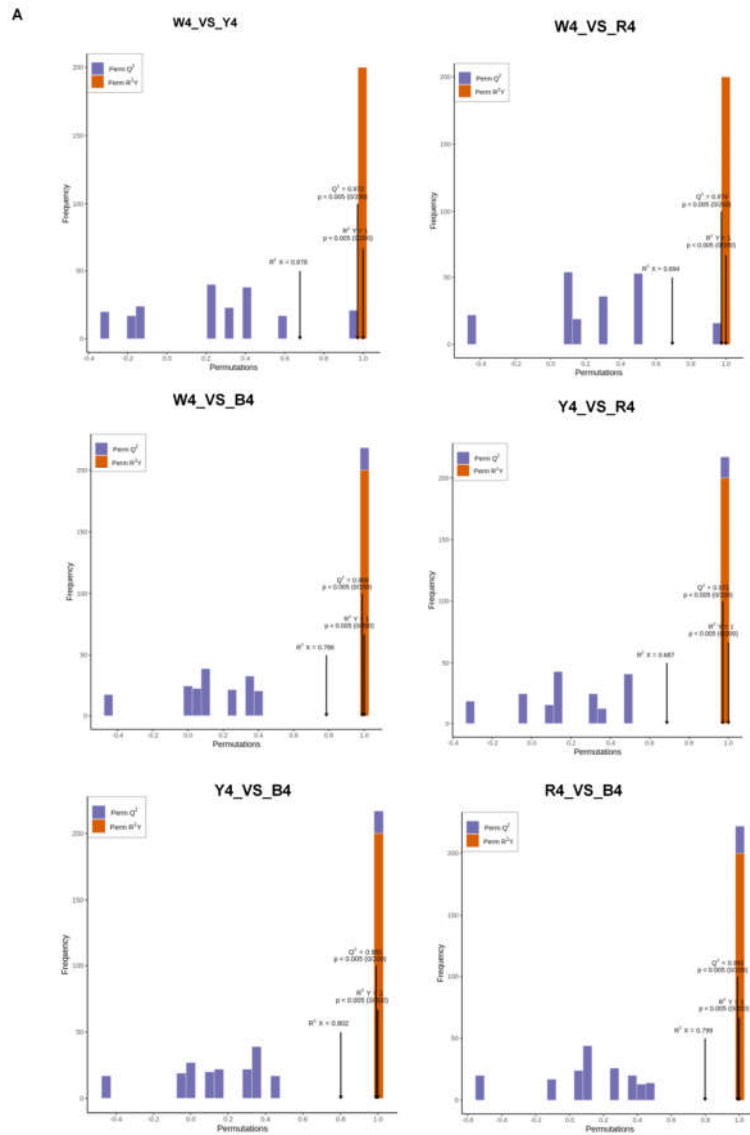

**Figure S2:** (A) OPLS-DA verification diagrams, the horizontal axis represents the accuracy of the model, while the vertical axis represents the frequency of the model's classification effect.



E

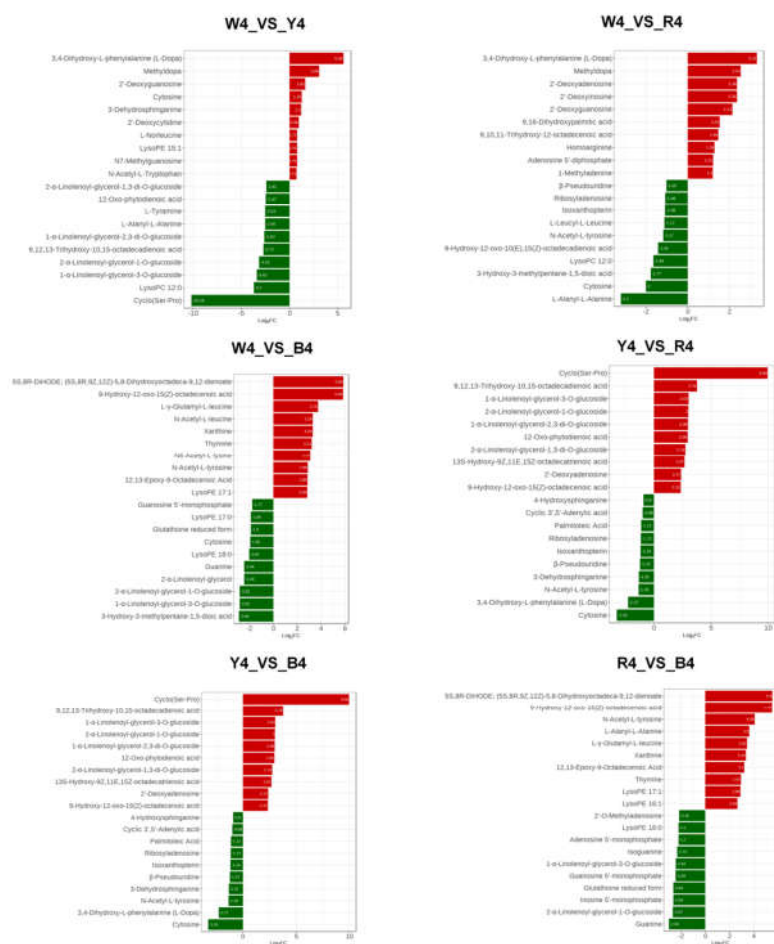

**Figure S2:** (E) Contrast diagrams illustrating comparisons between white and yellow, white and red, white and black, yellow and red, yellow and black, as well as red and black, the horizontal axis represents the log2 fold change (FC) of differentially expressed metabolites, which is the logarithm to the base 2 of the ratio of change in these metabolites. The vertical axis indicates the differentially expressed metabolites. Red denotes upregulated metabolites, while green signifies downregulated metabolites.

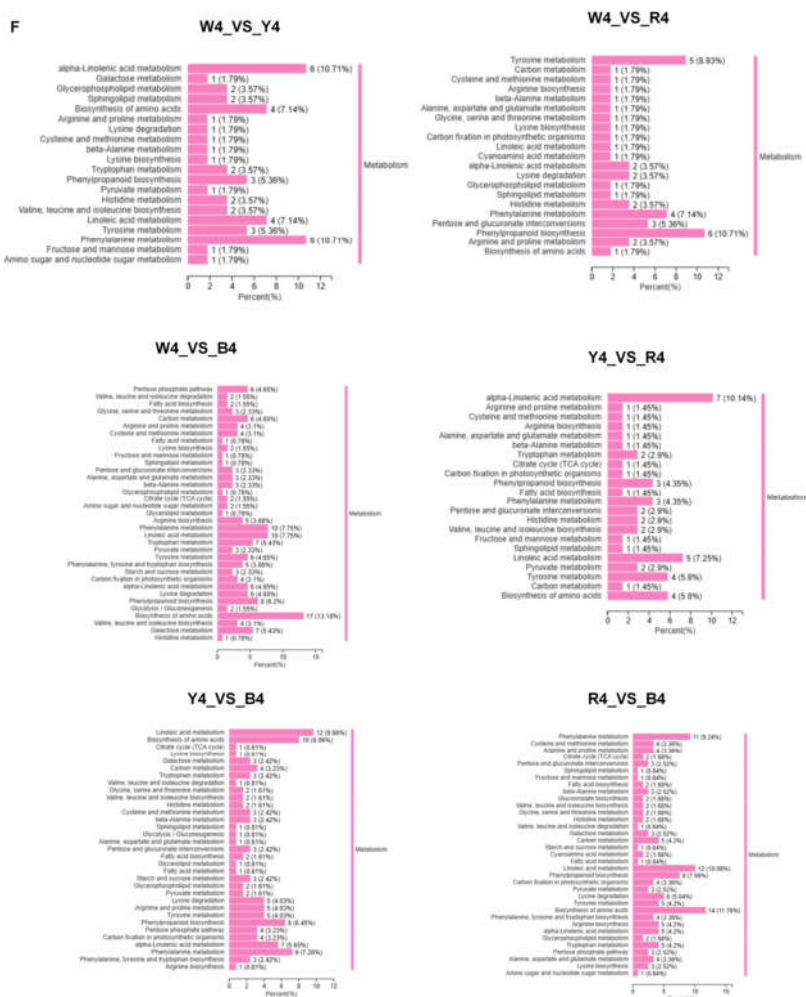

**Figure S2: (F)** GO enrichment diagram between different contrast groups, the horizontal axis represents the proportion of metabolites annotated to a given entry relative to the total number of annotated metabolites, while the vertical axis denotes the name of the GO (Gene Ontology) term.

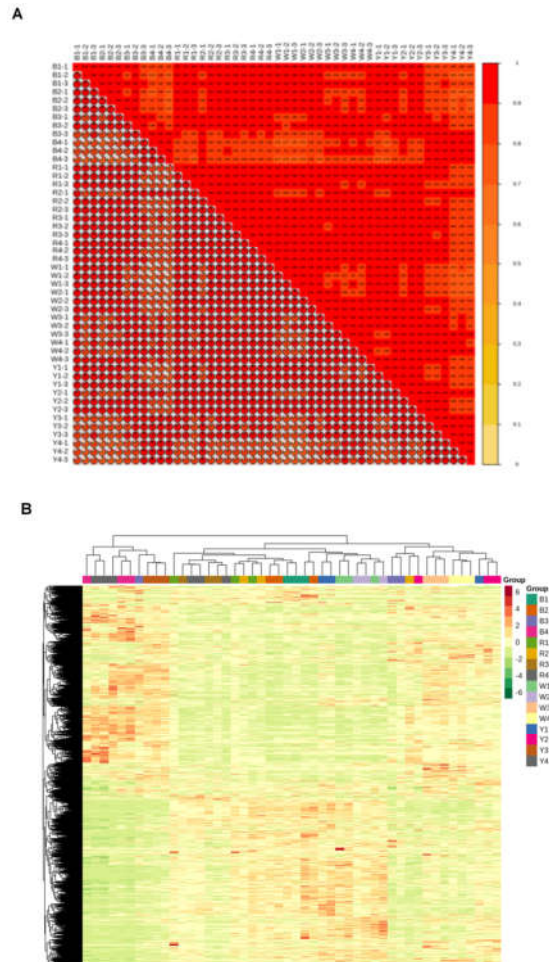

**Fig. S3 (A - B)** Figure A presents the correlation heatmap of 12 quinoa samples based on transcriptomic data, where the square of the Pearson correlation coefficient ( $R^2$ ) between biological replicates is expected to be above 0.8. Figure B depicts the gene clustering thermogram, with the abscissa indicating sample names and their hierarchical clustering outcomes, and the ordinate showing differentially expressed genes along with their hierarchical clustering results.

A

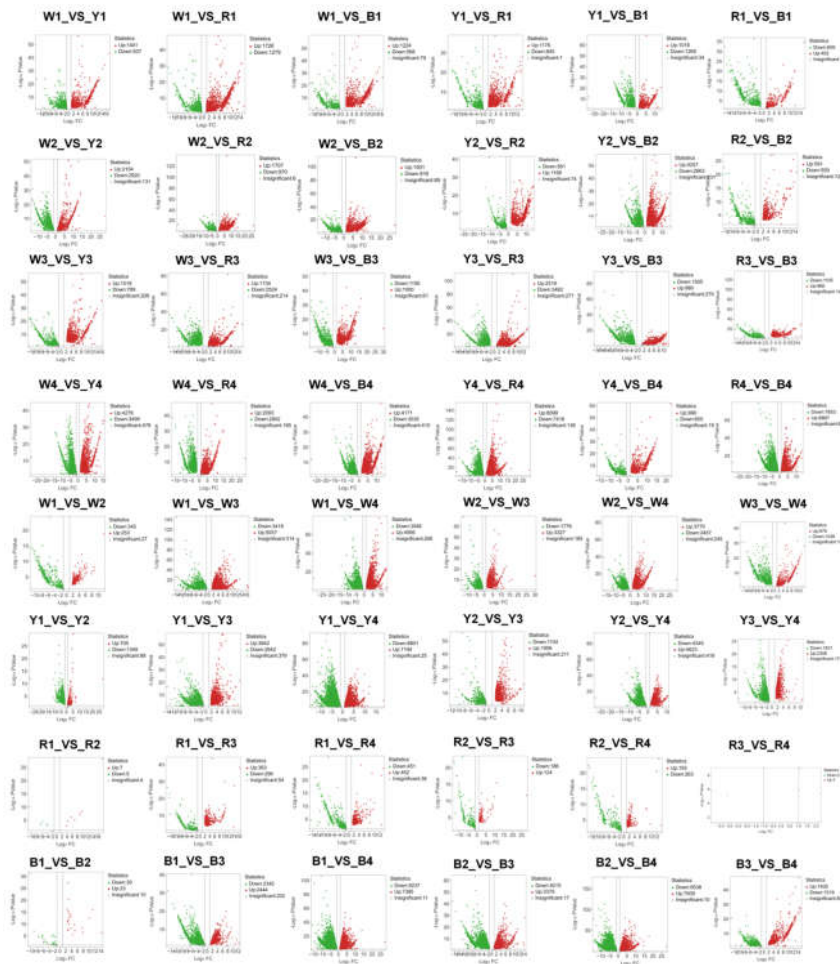

**Fig. S4 (A)** The differential gene volcano plot features the log<sub>2</sub> fold change of gene expression on the horizontal axis and the significance level of differential genes on the vertical axis. Red dots signify upregulated genes, while green dots indicate downregulated genes.



B-1

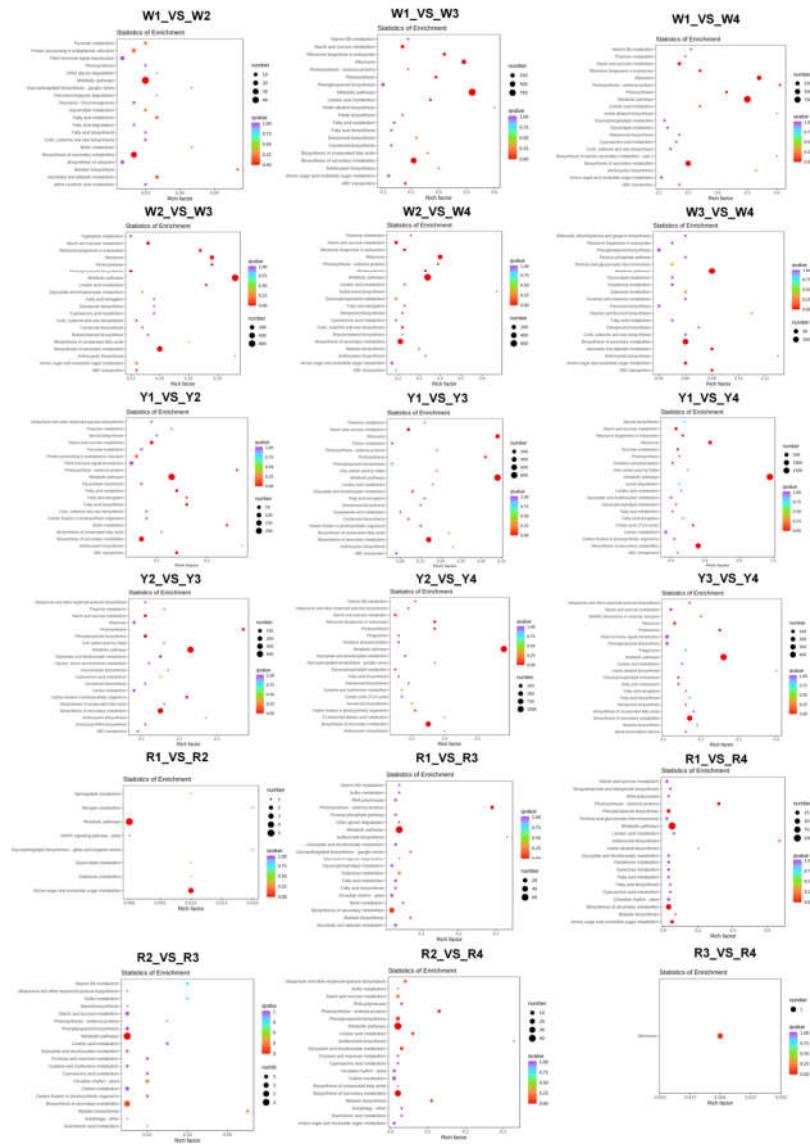



B-2

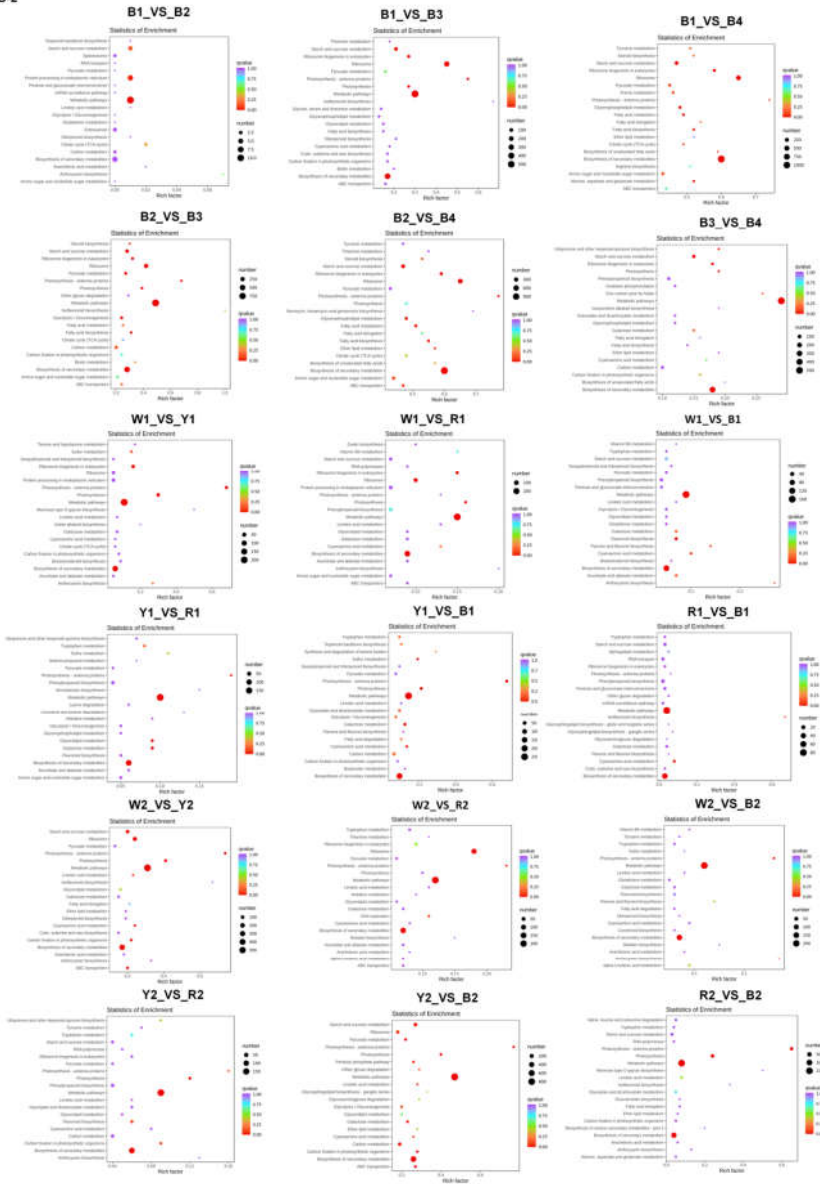

B-3

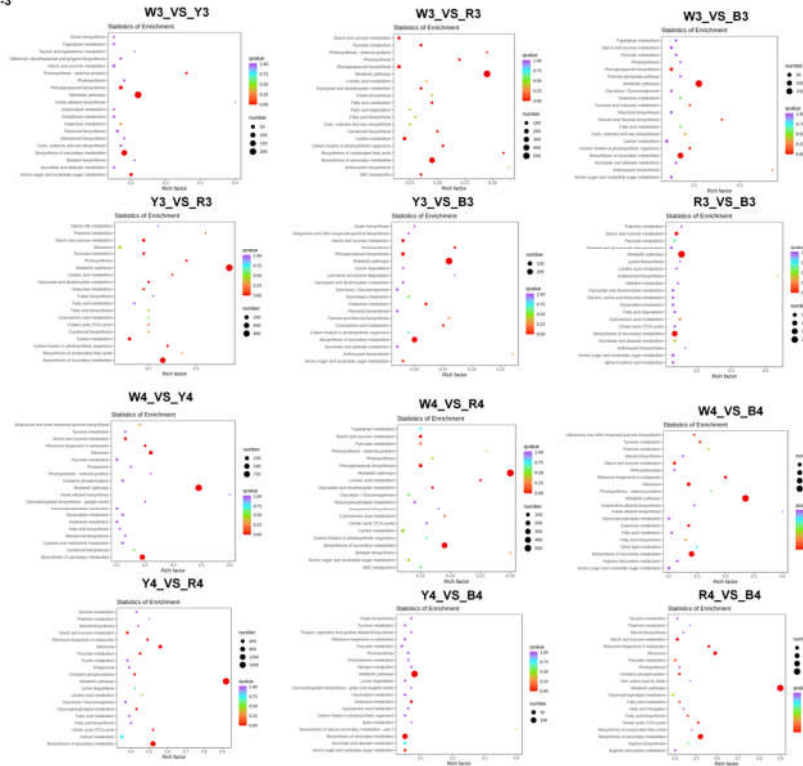

**Fig. S4 (B)** The enrichment scatter plot depicts KEGG pathways on the vertical axis and the Rich Factor on the horizontal axis. A higher Rich Factor indicates a greater degree of enrichment. The size of the dot corresponds to the number of differentially expressed genes enriched in the pathway; larger dots signify more genes. The color of the dot increasingly trending towards red indicates more significant enrichment.

C-1

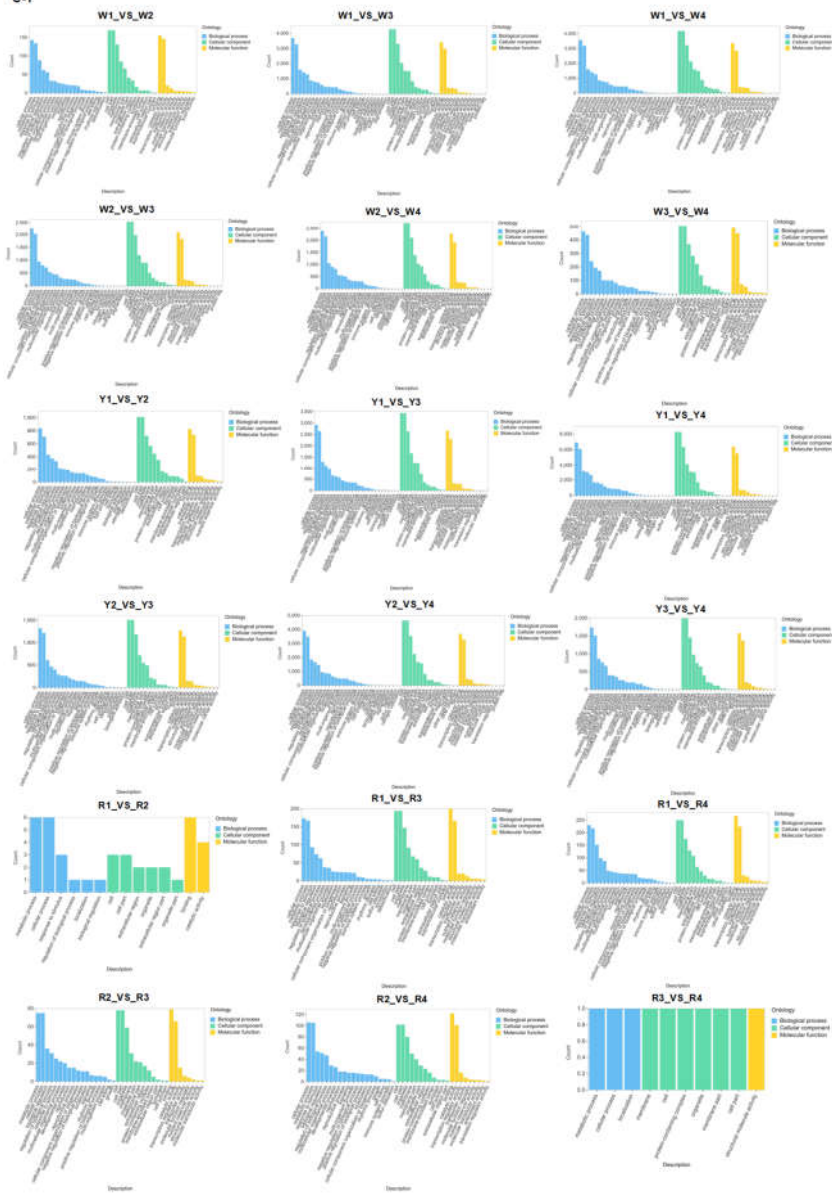

C-2

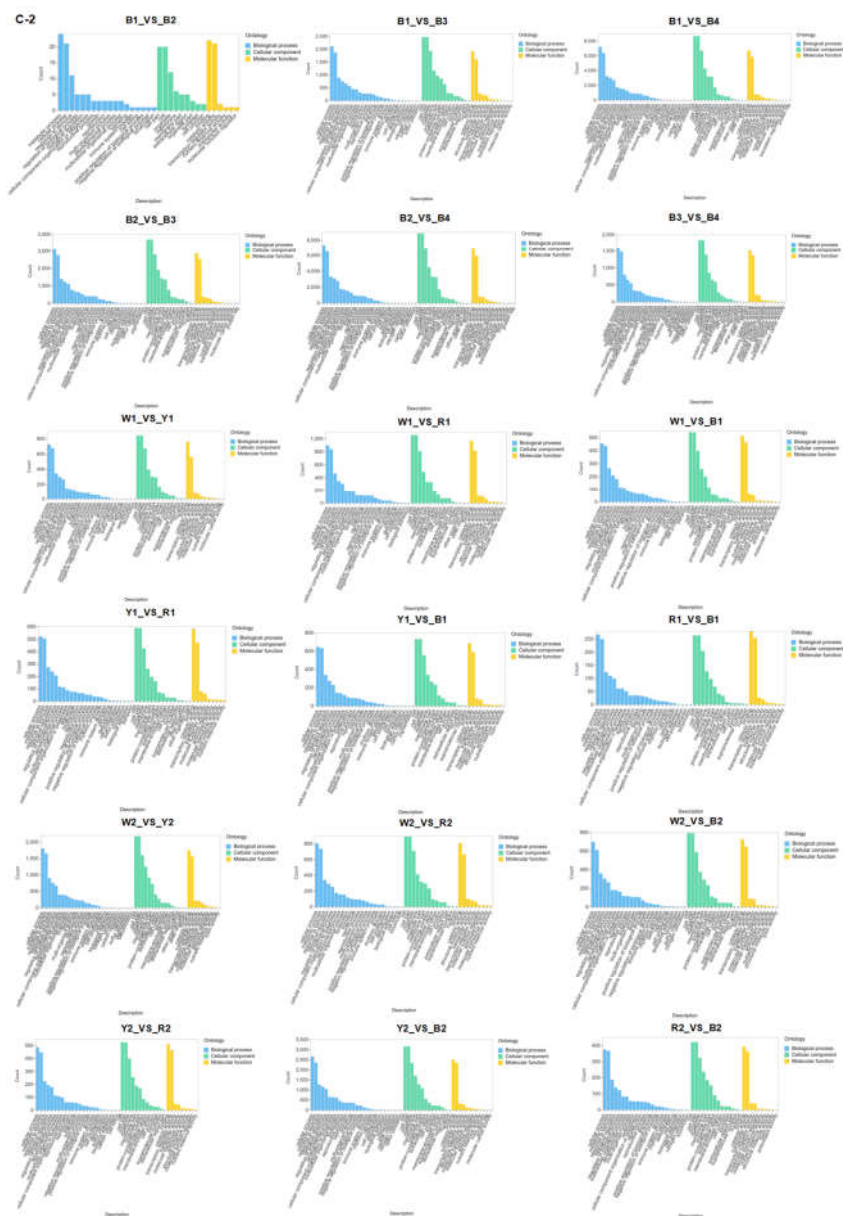

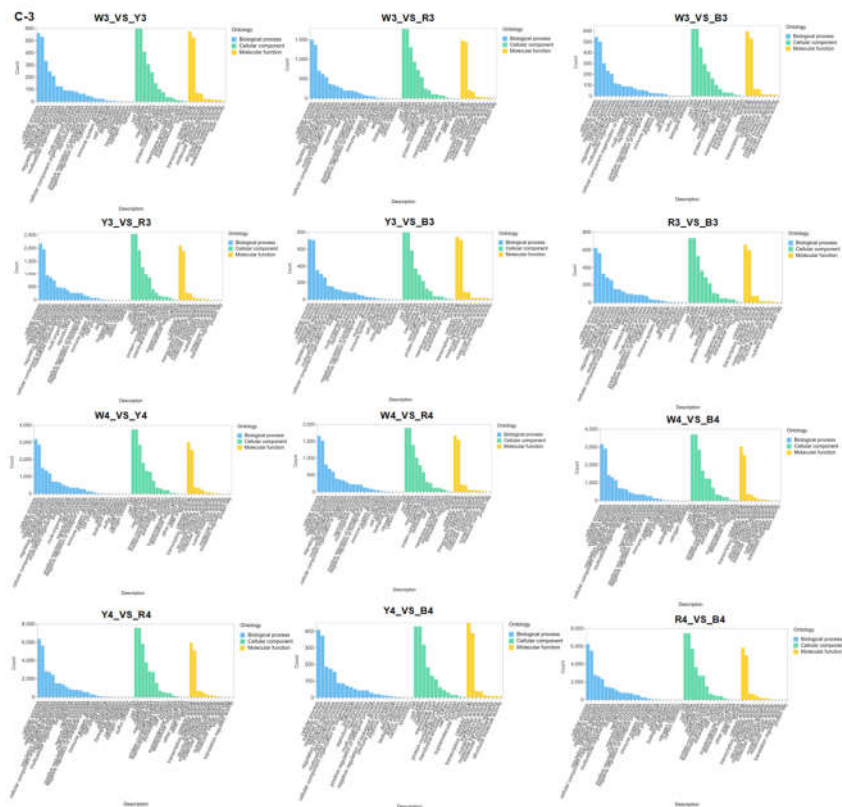

**Fig. S4 (C)** The differential gene category bar chart presents secondary GO (Gene Ontology) terms on the horizontal axis and the number of differential genes associated with each GO term on the vertical axis.

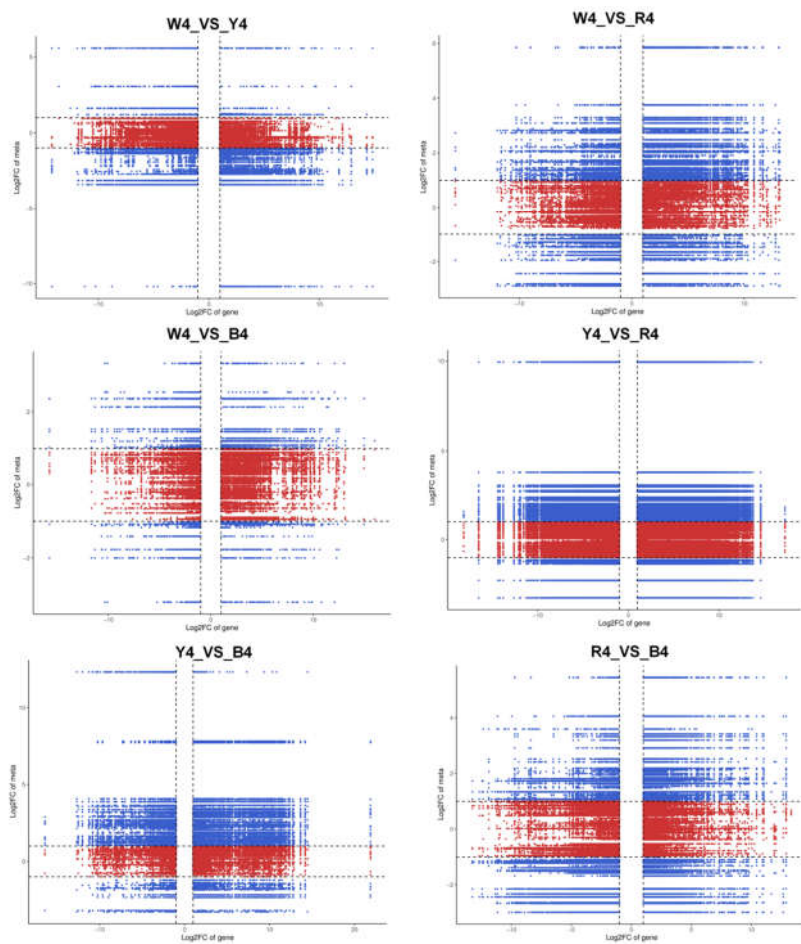

**Fig. S5** Nine quadrant diagram of correlation analysis, the correlation analysis nine-quadrant plot showcases the log2 fold change (FC) of genes on the horizontal axis and the log2 FC of metabolites on the vertical axis.

**Table S1. Primers used in the study.**

|                                   | Genes             | Forward primer (5' to 3') | Reverse primer (5' to 3') | Size |
|-----------------------------------|-------------------|---------------------------|---------------------------|------|
| starch<br>(Red VS<br>Black)       | gene-LOC110716805 | TGGCTCACTGGAGAAACCAC      | AAGTGTGCACCAACATTTCGC     | 117  |
|                                   | gene-LOC110722789 | CACTGATCGGCTTCATCGGT      | TTCCCAGGACAACGACTTGG      | 108  |
|                                   | gene-LOC110738785 | ACGGAACCAAAGCCGAATTG      | TCATCAGGCGTTCCACCTTC      | 151  |
|                                   | gene-LOC110720405 | AGCATGGTGGCTCCTTTCAA      | GCATTGGACTCTTCCACCGT      | 108  |
|                                   | gene-LOC110730081 | CTGACAAGTGTGAGCAGACCA     | GCTGCTCCTCCAAACACACT      | 140  |
| Lipid<br>(Yellow<br>VS<br>Black)  | gene-LOC110692055 | GAACCTATCCTTGGAGGGCG      | GCTGGGCCAAGACCTACTTC      | 128  |
|                                   | gene-LOC110732328 | CAATTGGATGAAGGCCGGGA      | AGGTGTTGTGCAACTCGACA      | 113  |
|                                   | gene-LOC110701563 | ATGCCTCTGGATCTTGTGGA      | TGGGATAGCTCGGTTGAGGT      | 145  |
|                                   | gene-LOC110699636 | GCCAATTTGCGCTCTGCTTC      | CGCGTTGGTTTTCTCTGCAA      | 138  |
|                                   | gene-LOC110709273 | AGGCTACTGGAAGGTTCTGC      | ATAACCGGAACCAGCAGACG      | 155  |
| Protein<br>(White<br>VS<br>Black) | gene-LOC110715590 | GCATCTGCTGGATCAGGCTA      | ACTGTCACCTGCCACCTTTA      | 123  |
|                                   | gene-LOC110728838 | AACCGCAGGTCCCTTGTTAC      | TCGATACCGTAAGGCGGGTA      | 109  |
|                                   | gene-LOC110710842 | GGGCACAACATCGAGAAGAC      | CGTCACCCCTGCGTTTAT        | 150  |
|                                   | gene-LOC110720003 | TGTACTCTAGTTGCCTTCCGC     | TTGGGGGTTTAACAGCAGCA      | 157  |
|                                   | gene-LOC110687170 | CGTCTCCAAAGCGAGGTTT       | AACTAGGCAACAAGACGCGA      | 177  |
| 参数基<br>因                          | gene-LOC110716004 | TACTGGAGGCCCTGGTTGTT      | GTTGGTGCTTCTGAGTGCCA      | 102  |
|                                   | gene-LOC110702086 | ATGCCTGGGATCATGCTGTT      | AGATAGCGCGGTACAAGCTG      | 162  |
|                                   | gene-LOC110724454 | GCCTTGGCAGACTTGTCCT       | TCTGGGGCATCTGTTGTTT       | 161  |
|                                   | gene-LOC110724577 | TTGTTGAGGCGCATAGTGGT      | TCCTCTGACTCAACAGCCCT      | 133  |
|                                   | gene-LOC110704171 | TAGGTGTGTTGGTACGCCAG      | TGTCGTTGTTGCATTGCTG       | 143  |
|                                   | gene-LOC110686607 | ACATACCTAGCGCAGCATCC      | TCTTGCCAACAACCTGAGCA      | 190  |
|                                   | CqActin1          | GTACGCATGGGTGCTTGACAAACT  | ATCAGCCTGGGAGGTACCAAGTAAT |      |
|                                   | CqActin2          | GTCCACAGAAAGTGCTTCTAAG    | AACAACCTCTACCTTCTCATG     |      |



**Table S2. Abundances of differentially expressed metabolites in experimental samples.**

| Group name | Up-regulated genes | Down-regulated genes | Significant DEGs |
|------------|--------------------|----------------------|------------------|
| W_vs_Y     | 5                  | 48                   | 53               |
| W_vs_R     | 15                 | 10                   | 25               |
| W_vs_B     | 71                 | 25                   | 96               |
| Y_vs_R     | 62                 | 8                    | 70               |
| Y_vs_B     | 103                | 15                   | 118              |
| R_vs_B     | 65                 | 27                   | 92               |

**Table S3 Quality statistics of quinoa transcriptome sequencing.**

| Sample | Raw Reads | Clean Reads | Clean Base<br>(G) | Error Rate<br>(%) | Q20<br>(%) | Q30<br>(%) | GC Content<br>(%) |
|--------|-----------|-------------|-------------------|-------------------|------------|------------|-------------------|
| B1-1   | 54096608  | 51608282    | 7.74              | 0.02              | 98.06      | 94.32      | 44.17             |
| B1-2   | 61401144  | 58834158    | 8.83              | 0.03              | 98.01      | 94.21      | 44.33             |
| B1-3   | 44395350  | 42475790    | 6.37              | 0.03              | 97.99      | 94.15      | 44.5              |
| B2-1   | 47087106  | 45076340    | 6.76              | 0.02              | 98.06      | 94.32      | 44.09             |
| B2-2   | 48329496  | 46187092    | 6.93              | 0.03              | 97.94      | 94.02      | 44.78             |
| B2-3   | 47028488  | 45045024    | 6.76              | 0.03              | 98.03      | 94.19      | 44.58             |
| B3-1   | 47988552  | 47018382    | 7.05              | 0.03              | 97.98      | 94.21      | 44.87             |
| B3-2   | 53241450  | 50651534    | 7.6               | 0.03              | 97.94      | 94.15      | 44.88             |
| B3-3   | 62613596  | 60874680    | 9.13              | 0.03              | 97.77      | 93.48      | 44.14             |
| B4-1   | 53500840  | 52016168    | 7.8               | 0.02              | 98.01      | 94.4       | 45.09             |
| B4-2   | 45408804  | 44090358    | 6.61              | 0.02              | 98.06      | 94.37      | 44                |
| B4-3   | 53813196  | 51330928    | 7.7               | 0.03              | 97.99      | 94.22      | 44.2              |
| R1-1   | 51021298  | 48740362    | 7.31              | 0.02              | 98.08      | 94.42      | 44.46             |
| R1-2   | 54196498  | 51826622    | 7.77              | 0.03              | 98.04      | 94.28      | 44.26             |
| R1-3   | 46311684  | 44077628    | 6.61              | 0.03              | 97.39      | 92.8       | 44.47             |
| R2-1   | 49232862  | 47631572    | 7.14              | 0.03              | 97.89      | 94.02      | 44.02             |
| R2-2   | 51674356  | 49237000    | 7.39              | 0.02              | 98.1       | 94.46      | 44.5              |
| R2-3   | 44925954  | 42088864    | 6.31              | 0.03              | 97.47      | 92.97      | 44.8              |
| R3-1   | 66786986  | 64479608    | 9.67              | 0.03              | 97.98      | 94.23      | 45.25             |
| R3-2   | 48115050  | 46283312    | 6.94              | 0.03              | 98.01      | 94.3       | 45.78             |
| R3-3   | 53646258  | 51052602    | 7.66              | 0.02              | 98.08      | 94.4       | 44.96             |
| R4-1   | 52806648  | 50687776    | 7.6               | 0.03              | 97.99      | 94.23      | 45.14             |
| R4-2   | 51931882  | 49359080    | 7.4               | 0.03              | 97.86      | 93.83      | 44.81             |
| R4-3   | 52818358  | 49110568    | 7.37              | 0.03              | 97.98      | 94.23      | 45.72             |
| W1-1   | 51314148  | 48338758    | 7.25              | 0.03              | 97.97      | 94.13      | 43.83             |
| W1-2   | 49640726  | 46661282    | 7                 | 0.02              | 98.08      | 94.41      | 44.12             |
| W1-3   | 46766966  | 44014206    | 6.6               | 0.02              | 98.07      | 94.4       | 44.05             |
| W2-1   | 47070410  | 44411676    | 6.66              | 0.03              | 98         | 94.24      | 43.85             |
| W2-2   | 48039052  | 45238176    | 6.79              | 0.02              | 98.08      | 94.39      | 44.41             |
| W2-3   | 51682818  | 48153110    | 7.22              | 0.03              | 98.02      | 94.28      | 44.94             |
| W3-1   | 44205582  | 41961984    | 6.29              | 0.03              | 98.02      | 94.24      | 43.71             |
| W3-2   | 44406054  | 42004898    | 6.3               | 0.03              | 97.98      | 94.23      | 44.9              |
| W3-3   | 48546372  | 46176266    | 6.93              | 0.02              | 98.09      | 94.44      | 43.86             |
| W4-1   | 44527432  | 41906790    | 6.29              | 0.03              | 98.02      | 94.28      | 44.01             |
| W4-2   | 51191394  | 48749892    | 7.31              | 0.03              | 97.95      | 94.16      | 44.22             |
| W4-3   | 47559620  | 44552948    | 6.68              | 0.03              | 97.92      | 94.08      | 44.47             |
| Y1-1   | 51006906  | 47949360    | 7.19              | 0.03              | 97.94      | 94.04      | 44.22             |
| Y1-2   | 43074092  | 39993932    | 6                 | 0.03              | 97.43      | 92.83      | 43.91             |
| Y1-3   | 50887776  | 48117848    | 7.22              | 0.03              | 98.04      | 94.3       | 44.44             |
| Y2-1   | 47228280  | 45024308    | 6.75              | 0.02              | 98.05      | 94.41      | 44.86             |
| Y2-2   | 45845776  | 43530728    | 6.53              | 0.03              | 97.83      | 93.84      | 44.37             |

|      |          |          |      |      |       |       |       |
|------|----------|----------|------|------|-------|-------|-------|
| Y2-3 | 51942858 | 48706152 | 7.31 | 0.03 | 98.02 | 94.26 | 44.54 |
| Y3-1 | 51054986 | 49044174 | 7.36 | 0.02 | 98.09 | 94.48 | 43.95 |
| Y3-2 | 50372706 | 47775818 | 7.17 | 0.03 | 97.91 | 94.01 | 44.15 |
| Y3-3 | 49717164 | 47454288 | 7.12 | 0.03 | 98.01 | 94.24 | 43.84 |
| Y4-1 | 47402274 | 45653896 | 6.85 | 0.02 | 98.02 | 94.35 | 45.67 |
| Y4-2 | 45762090 | 43499124 | 6.52 | 0.03 | 98.04 | 94.31 | 43.93 |
| Y4-3 | 54076248 | 51774578 | 7.77 | 0.03 | 97.92 | 94.22 | 45.06 |

**Table S4 Abundances of differentially expressed genes in experimental samples.**

| Group name | Up-regulated genes | Down-regulated genes | Total DEGs |
|------------|--------------------|----------------------|------------|
| W1_vs_W2   | 253                | 345                  | 625        |
| W1_vs_W3   | 5057               | 3418                 | 8789       |
| W1_vs_W4   | 4995               | 3546                 | 8807       |
| W2_vs_W3   | 3327               | 1776                 | 5288       |
| W2_vs_W4   | 3770               | 2457                 | 6472       |
| W3_vs_W4   | 678                | 1039                 | 1735       |
| Y1_vs_Y2   | 705                | 1349                 | 2140       |
| Y1_vs_Y3   | 3842               | 2642                 | 6863       |
| Y1_vs_Y4   | 7194               | 8801                 | 16020      |
| Y2_vs_Y3   | 1906               | 1104                 | 3221       |
| Y2_vs_Y4   | 4623               | 4345                 | 9387       |
| Y3_vs_Y4   | 2308               | 1831                 | 4312       |
| R1_vs_R2   | 7                  | 5                    | 16         |
| R1_vs_R3   | 363                | 296                  | 713        |
| R1_vs_R4   | 452                | 451                  | 939        |
| R2_vs_R3   | 124                | 186                  | 310        |
| R2_vs_R4   | 193                | 263                  | 456        |
| R3_vs_R4   | 3                  | 2                    | 5          |
| B1_vs_B2   | 23                 | 30                   | 63         |
| B1_vs_B3   | 2444               | 2342                 | 4988       |
| B1_vs_B4   | 7385               | 9237                 | 16633      |
| B2_vs_B3   | 3379               | 4015                 | 7411       |
| B2_vs_B4   | 7609               | 9538                 | 17157      |
| B3_vs_B4   | 1930               | 1519                 | 4014       |
| W1_vs_Y1   | 1401               | 937                  | 2338       |
| W1_vs_R1   | 1726               | 1279                 | 3005       |
| W1_vs_B1   | 1224               | 568                  | 1871       |
| Y1_vs_R1   | 1176               | 845                  | 2022       |
| Y1_vs_B1   | 1018               | 1269                 | 2321       |
| R1_vs_B1   | 402                | 609                  | 1012       |
| W2_vs_Y2   | 2104               | 2920                 | 5155       |
| W2_vs_R2   | 1707               | 970                  | 2683       |
| W2_vs_B2   | 1501               | 916                  | 2506       |
| Y2_vs_R2   | 1168               | 561                  | 1803       |
| Y2_vs_B2   | 4257               | 2663                 | 7151       |
| R2_vs_B2   | 591                | 559                  | 1277       |
| W3_vs_Y3   | 1018               | 789                  | 2015       |
| W3_vs_R3   | 1734               | 2524                 | 4472       |
| W3_vs_B3   | 1000               | 1156                 | 2217       |
| Y3_vs_R3   | 2519               | 3462                 | 6252       |
| Y3_vs_B3   | 880                | 1505                 | 2655       |
| R3_vs_B3   | 960                | 1105                 | 2212       |

|          |      |      |       |
|----------|------|------|-------|
| W4_vs_Y4 | 4276 | 3499 | 8253  |
| W4_vs_R4 | 2093 | 2902 | 5180  |
| W4_vs_B4 | 4171 | 3535 | 8116  |
| Y4_vs_R4 | 8099 | 7418 | 15655 |
| Y4_vs_B4 | 990  | 655  | 1664  |
| R4_vs_B4 | 6867 | 7853 | 14782 |

---

**Table S6.Differential expression of lipid anabolism and regulatory genes in four quinoa cultivars.**

|        | Name                | ID                | log2FoldChange | regulated | KEGG                                                        |
|--------|---------------------|-------------------|----------------|-----------|-------------------------------------------------------------|
| Y_VS_B |                     | gene-LOC110690870 | 2.018512315    | up        | K01047 secretory phospholipase A2                           |
| Y_VS_B |                     | gene-LOC110719406 | 4.115241091    | up        | K16860 phospholipase                                        |
| Y_VS_B | phospholipase       | gene-LOC110721654 | 2.229687324    | up        | K01115 phospholipase                                        |
| Y_VS_B |                     | gene-LOC110703973 | 2.315805139    | up        | K01114 phospholipase                                        |
| Y_VS_B |                     | gene-LOC110707948 | 2.025634362    | up        | K01115 phospholipase                                        |
| Y_VS_B |                     | gene-LOC110720422 | 2.12490006     | up        | K01114 phospholipase                                        |
| Y_VS_B |                     | gene-LOC110730326 | 3.357450167    | up        | K16818 phospholipase                                        |
| Y_VS_B |                     |                   |                |           | K13508 glycerol-3-phosphate                                 |
| Y_VS_B |                     | gene-LOC110701190 | 2.959334245    | up        | acyltransferase                                             |
| Y_VS_B |                     | gene-LOC110705050 | 2.393136101    | up        | K13513 lysocardiolipin and lysophospholipid acyltransferase |
| Y_VS_B |                     | gene-LOC110705915 | 11.278536521   | up        | K07513 acetyl-CoA acyltransferase 1                         |
| Y_VS_B | acyltransferase     | gene-LOC110725144 | 2.496012216    | up        | --                                                          |
| Y_VS_B |                     | gene-LOC110728089 | 2.174885798    | up        | K07513 acetyl-CoA acyltransferase 1                         |
| Y_VS_B |                     |                   |                |           | K20027 protein                                              |
| Y_VS_B |                     | gene-LOC110733003 | 2.739921015    | up        | S-acyltransferase 18-like                                   |
| Y_VS_B |                     | gene-LOC110734253 | 2.902489631    | up        | K20027 protein                                              |
| Y_VS_B |                     | gene-LOC110682398 | 3.83973578     | up        | S-acyltransferase 18-like                                   |
| Y_VS_B |                     | gene-LOC110701189 | 2.478499908    | up        | K13508 glycerol-3-phosphate acyltransferase                 |
| Y_VS_B |                     | gene-LOC110695766 | 2.008666078    | up        | --                                                          |
| Y_VS_B |                     | gene-LOC110696324 | 3.891072706    | up        | --                                                          |
| Y_VS_B |                     | gene-LOC110697429 | 2.596250312    | up        | --                                                          |
| Y_VS_B |                     | gene-LOC110699636 | 3.676911891    | up        | --                                                          |
| Y_VS_B |                     | gene-LOC110701532 | 2.221307865    | up        | --                                                          |
| Y_VS_B |                     | gene-LOC110708586 | 2.036857308    | up        | --                                                          |
| Y_VS_B |                     | gene-LOC110709273 | 3.586487937    | up        | --                                                          |
| Y_VS_B | GDGL                | gene-LOC110715590 | 4.449791538    | up        | --                                                          |
| Y_VS_B |                     | gene-LOC110728838 | 3.320450486    | up        | --                                                          |
| Y_VS_B |                     | gene-LOC110729899 | 2.338297313    | up        | --                                                          |
| Y_VS_B |                     | gene-LOC110735188 | 2.615743847    | up        | --                                                          |
| Y_VS_B |                     | gene-LOC110736706 | 3.689950015    | up        | --                                                          |
| Y_VS_B |                     | gene-LOC110691892 | 2.969890679    | up        | --                                                          |
| Y_VS_B |                     | gene-LOC110724356 | 2.70065839     | up        | --                                                          |
| Y_VS_B |                     | gene-LOC110701563 | 3.728743031    | up        | --                                                          |
| Y_VS_R | long chain acyl-CoA | gene-LOC110732999 | 2.073182437    | up        | K01897 long-chain acyl-CoA synthetase                       |

|        |                                          |                   |             |    |                                                    |
|--------|------------------------------------------|-------------------|-------------|----|----------------------------------------------------|
| Y_VS_R | synthetase<br>1-like                     | gene-LOC110734248 | 4.779350197 | up | K01897 long-chain acyl-CoA<br>synthetase<br>K03921 |
| Y_VS_R | acyl-[acyl-carrier-protein]              | gene-LOC110738720 | 3.070093996 | up | acyl-[acyl-carrier-protein]<br>desaturase          |
| Y_VS_B | desaturase                               | gene-LOC110701189 | 2.478499908 | up | K13508 glycerol-3-phosphate<br>acyltransferase     |
| Y_VS_B | non-specific<br>phospholipase<br>C4-like | gene-LOC110720422 | 2.12490006  | up | K01114 non-specific<br>phospholipase C4-like       |

---



**Table S7.Amino acid biosynthesis and differential expression of regulatory genes in four quinoa cultivars.**

| Name   | ID                | log2FoldChange | regulated | KEGG                                                 |
|--------|-------------------|----------------|-----------|------------------------------------------------------|
| W_VS_B | gene-LOC110682345 | 2.822007231    | up        | K16290 xylem cysteine<br>proteinase                  |
| W_VS_B | gene-LOC110697218 | 2.101185917    | up        | K16292 KDEL-tailed cysteine<br>endopeptidase         |
| W_VS_B | gene-LOC110707153 | 2.070623903    | up        | K16292 KDEL-tailed cysteine<br>endopeptidase         |
| W_VS_B | gene-LOC110717421 | 2.583938352    | up        | K18342 OTU<br>domain-containing protein 6            |
| Y_VS_R | gene-LOC110686006 | 2.01411126     | up        | K01611 S-adenosylmethionine<br>decarboxylase         |
| W_VS_B | gene-LOC110732957 | -1.866631126   | down      | K00789 S-adenosylmethionine<br>synthetase            |
| W_VS_B | gene-LOC110734214 | -1.449182529   | down      | K00789 S-adenosylmethionine<br>synthetase            |
| W_VS_B | gene-LOC110702086 | 2.07508958     | up        | K16297 serine<br>carboxypeptidase-like clade II      |
| W_VS_B | gene-LOC110716004 | 4.836182431    | up        | K16296 serine<br>carboxypeptidase-like clade I       |
| W_VS_B | gene-LOC110702087 | -2.973743546   | down      | K16297 serine<br>carboxypeptidase-like clade II      |
| W_VS_B | gene-LOC110725795 | -3.242111323   | down      | K16297 serine<br>carboxypeptidase-like clade II      |
| W_VS_B | gene-LOC110735784 | -2.97490357    | down      | K16297 serine<br>carboxypeptidase-like clade II      |
| W_VS_B | gene-LOC110683521 | -4.049796083   | down      | K16297 serine<br>carboxypeptidase-like clade II      |
| W_VS_B | gene-LOC110694414 | -1.6194035     | down      | K09645 vitellogenic<br>carboxypeptidase-like protein |
| W_VS_B | gene-LOC110700281 | -1.307843198   | down      | K16296 serine<br>carboxypeptidase-like clade I       |
| W_VS_B | gene-LOC110716913 | -2.926401022   | down      | K16296 serine<br>carboxypeptidase-like clade I       |
| W_VS_B | gene-LOC110717872 | -1.222901754   | down      | K16296 serine<br>carboxypeptidase-like clade I       |
| W_VS_B | gene-LOC110722155 | 5.79306333     | up        | K16296 serine<br>carboxypeptidase-like clade I       |
| W_VS_B | gene-LOC110738566 | -3.435078188   | down      | K16296 serine<br>carboxypeptidase-like clade I       |
| W_VS_B | gene-LOC110708548 | -1.897733611   | down      | K00620 glutamate<br>N-acetyltransferase              |

|        |                                        |                   |              |      |                                           |
|--------|----------------------------------------|-------------------|--------------|------|-------------------------------------------|
| W_VS_B | Glutamate<br>acetyltransferase         | gene-LOC110722428 | -1.836363761 | down | K01915 glutamine synthetase               |
| W_VS_B | arginine<br>decarboxylase-like         | gene-LOC110718863 | -2.066920966 | down | K01583 arginine decarboxylase             |
| W_VS_B | tryptophan synthase                    | gene-LOC110723779 | 1.232752463  | up   | K01696 tryptophan synthase<br>beta chain  |
| W_VS_B | beta chain 1-like                      | gene-LOC110687330 | -1.310354151 | down | K01696 tryptophan synthase<br>beta chain  |
| W_VS_B | alanine-glyoxylate<br>aminotransferase | gene-LOC110698132 | -1.815966938 | down | K00827 alanine-glyoxylate<br>transaminase |

---

**Table S8.Differential expression of embryo size regulatory genes in four quinoa varieties.**

| Name   | ID                                            | log2FoldChange | regulated | KEGG                                                          |
|--------|-----------------------------------------------|----------------|-----------|---------------------------------------------------------------|
| W_VS_B | gene-LOC110716604                             | 2.889262665    | up        | uncharacterized protein<br>LOC110716604                       |
| W_VS_B | gene-LOC110705031                             | 5.088714453    | up        | late embryogenesis abundant protein<br>76-like                |
| W_VS_B | gene-LOC110714155                             | 2.946375253    | up        | desiccation protectant protein Lea14<br>homolog               |
| W_VS_B | gene-LOC110683581                             | -3.28841043    | down      | NDR1/HIN1-like protein 1                                      |
| W_VS_B | gene-LOC110688154                             | -2.594834767   | down      | NDR1/HIN1-like protein 1                                      |
| W_VS_B | gene-LOC110690801                             | -2.62040035    | down      | uncharacterized protein<br>LOC110690801                       |
| W_VS_B | gene-LOC110691091                             | -3.608463751   | down      | uncharacterized protein<br>LOC110691091                       |
| W_VS_B | gene-LOC110697633                             | -2.877319788   | down      | NDR1/HIN1-like protein 6                                      |
| W_VS_B | late gene-LOC110711156                        | -2.362261181   | down      | NDR1/HIN1-like protein 6                                      |
| W_VS_B | embryogenesis gene-LOC110711957               | -4.283661574   | down      | NDR1/HIN1-like protein 13                                     |
| W_VS_B | abundant protein gene-LOC110726609            | -4.810095326   | down      | SENESCENCE-ASSOCIATED<br>GENE 21, mitochondrial-like          |
| W_VS_B | gene-LOC110727033                             | -4.371567585   | down      | late embryogenesis abundant protein<br>At5g17165-like         |
| W_VS_B | gene-LOC110730324                             | -3.605111351   | down      | NDR1/HIN1-like protein 3                                      |
| W_VS_B | gene-LOC110730339                             | -3.986779036   | down      | late embryogenesis abundant protein<br>At5g17165-like         |
| W_VS_B | gene-LOC110731029                             | -3.458993141   | down      | NDR1/HIN1-like protein 3                                      |
| W_VS_B | gene-LOC110731592                             | -2.261837273   | down      | late embryogenesis abundant protein<br>Lea14-A-like           |
| W_VS_B | gene-LOC110731974                             | -3.222967142   | down      | uncharacterized protein<br>LOC110731974                       |
| W_VS_B | gene-LOC110733190                             | -3.737153456   | down      | NDR1/HIN1-like protein 6                                      |
| W_VS_B | gene-LOC110740332                             | -4.080992078   | down      | NDR1/HIN1-like protein 13                                     |
| W_VS_B | gene-LOC110731115                             | 2.862959548    | up        | non-specific lipid-transfer protein-like                      |
| W_VS_B | gene-LOC110690672                             | -4.400402213   | down      | non-specific lipid-transfer protein-like                      |
| W_VS_B | gene-LOC110690674                             | -1.945161563   | down      | non-specific lipid-transfer protein-like                      |
| W_VS_B | gene-LOC110690676                             | -4.647566761   | down      | non-specific lipid-transfer protein-like                      |
| W_VS_B | non-specific lipid-transfer gene-LOC110738300 | -2.056741724   | down      | non-specific lipid-transfer protein-like<br>protein At2g13820 |
| W_VS_B | protein-like gene-LOC110687238                | 1.515748057    | up        | non-specific lipid-transfer protein-like                      |
| W_VS_B | gene-LOC110690671                             | -5.340938928   | down      | non-specific lipid-transfer protein-like                      |
| W_VS_B | gene-LOC110690675                             | -6.275814923   | down      | non-specific lipid-transfer protein-like                      |
| W_VS_B | gene-LOC110693486                             | 2.398216793    | up        | non-specific lipid-transfer protein-like                      |
| W_VS_B | gene-LOC110697005                             | 3.274617629    | up        | non-specific lipid-transfer protein-like<br>protein At2g13820 |

|        |                   |              |      |                                                               |
|--------|-------------------|--------------|------|---------------------------------------------------------------|
| W_VS_B | gene-LOC110716624 | -1.860413629 | down | non-specific lipid-transfer protein-like<br>protein At5g64080 |
| W_VS_B | gene-LOC110726962 | 2.458687902  | up   | non-specific lipid-transfer protein-like                      |
| W_VS_B | gene-LOC110729006 | -3.22459051  | down | non-specific lipid-transfer protein-like<br>protein At2g13820 |
| W_VS_B | gene-LOC110731103 | -5.364425016 | down | non-specific lipid-transfer protein-like                      |

---

**Table S9. The number of nutrient-related genes.**

| metabolic pathway                           | Total genes |
|---------------------------------------------|-------------|
| glycometabolism                             | 288         |
| lipid metabolism                            | 282         |
| Starch and sucrose metabolism               | 158         |
| Amino sugar and nucleotide sugar metabolism | 71          |
| Transcription factor                        | 227         |
| Glycine, serine and threonine metabolism    | 153         |
| Alanine, aspartate and glutamate metabolism | 27          |
| Arginine and proline metabolism             | 48          |
| Tryptophan metabolism                       | 32          |
| Lysine and histidine metabolism             | 71          |
| Leucine metabolism                          | 44          |
| Tyrosine metabolism                         | 14          |
| Valine and isoleucine metabolism            | 7           |
| Other biosynthesis of amino acids           | 60          |
| late embryogenesis abundant protein         | 21          |
| non-specific lipid-transfer protein         | 40          |
