# Supplementary material for: Metabolome and Transcriptome Association Analysis Reveals Mechanism of Synthesis of Nutrient Composition in Quinoa (Chenopodium quinoa Willd.) Seeds
Source: MDPI journal article supplement (doi:10.3390/foods13091325), 2024-04-26
Supplement: s1 [file s1]

**Table S5. Differential expression of carbon metabolism and regulatory genes in four quinoa cultivars**

|        | Name                            | ID                | log2FoldChange | regulated | KEGG                                                                 |
|--------|---------------------------------|-------------------|----------------|-----------|----------------------------------------------------------------------|
| Y_VS_R |                                 | gene-LOC110685808 | 1.984184284    | up        | K01792<br>glucose-6-phosph<br>hate 1-epimerase                       |
| Y_VS_R | glucose-6-phosphate 1-epimerase | gene-LOC110704761 | 3.036065833    | up        | K01792<br>glucose-6-phosph<br>hate 1-epimerase                       |
| Y_VS_R |                                 | gene-LOC110707537 | 3.9918045      | up        | K01792<br>glucose-6-phosph<br>hate 1-epimerase                       |
| Y_VS_R |                                 | gene-LOC110727040 | 1.079349106    | up        | K01785 aldose<br>1-epimerase                                         |
| Y_VS_R | aldose 1-epimerase              | gene-LOC110727040 | 1.575752533    | up        | K01785 aldose<br>1-epimerase                                         |
| Y_VS_R |                                 | gene-LOC110685808 | 1.984184284    | up        | K01792<br>glucose-6-phosph<br>hate 1-epimerase                       |
| Y_VS_R | 6-phosphofructokinase 1         | gene-LOC110736626 | 2.055880414    | up        | K00850<br>6-phosphofructo<br>kinase 1                                |
| Y_VS_R |                                 | gene-LOC110694871 | 1.100636504    | up        | K01102<br>pyruvate<br>dehydrogenase<br>phosphatase                   |
| Y_VS_R |                                 | gene-LOC110697295 | 1.295637853    | up        | K01102<br>pyruvate<br>dehydrogenase<br>phosphatase                   |
| Y_VS_R | pyruvate dehydrogenase          | gene-LOC110698093 | 1.108074132    | up        | K00161<br>pyruvate<br>dehydrogenase<br>E1 component<br>alpha subunit |
| Y_VS_R |                                 | gene-LOC110703927 | 2.82845892     | up        | K00162<br>pyruvate<br>dehydrogenase<br>E1 component<br>beta subunit  |
| Y_VS_R |                                 | gene-LOC110711593 | 2.212996713    | up        | K00162<br>pyruvate<br>dehydrogenase<br>E1 component                  |

|        |                                |                   |             |    |                                    |
|--------|--------------------------------|-------------------|-------------|----|------------------------------------|
|        |                                |                   |             |    | beta subunit                       |
|        |                                |                   |             |    | K01102                             |
| Y_VS_R |                                | gene-LOC110738218 | 1.42691216  | up | pyruvate dehydrogenase             |
|        |                                |                   |             |    | phosphatase                        |
|        |                                |                   |             |    | K00162                             |
| Y_VS_R |                                | gene-LOC110739657 | 2.299423621 | up | pyruvate dehydrogenase             |
|        |                                |                   |             |    | E1 component                       |
|        |                                |                   |             |    | beta subunit                       |
|        |                                |                   |             |    | K00592                             |
| Y_VS_R |                                | gene-LOC110691796 | 1.437561632 | up | fructose-bisphosphate aldolase     |
|        |                                |                   |             |    | K01623                             |
| Y_VS_R |                                | gene-LOC110705177 | 3.839910634 | up | fructose-bisphosphate aldolase     |
|        |                                |                   |             |    | K19199                             |
| Y_VS_R |                                | gene-LOC110712665 | 1.582636837 | up | histone-lysine N-methyltransferase |
|        | fructose-bisphosphate aldolase |                   |             |    | K01623                             |
| Y_VS_R |                                | gene-LOC110718872 | 3.766159744 | up | fructose-bisphosphate aldolase     |
|        |                                |                   |             |    | K00592                             |
| Y_VS_R |                                | gene-LOC110730842 | 1.762210155 | up | fructose-bisphosphate aldolase     |
|        |                                |                   |             |    | K00592                             |
| Y_VS_R |                                | gene-LOC110734726 | 1.178846637 | up | fructose-bisphosphate aldolase     |
|        |                                |                   |             |    | K00008 L-idoitol 2-dehydrogenase   |
| Y_VS_R |                                | gene-LOC110710556 | 3.717704575 | up | K00008 L-idoitol 2-dehydrogenase   |
|        |                                |                   |             |    | K00083                             |
| Y_VS_R |                                | gene-LOC110695210 | 1.10012886  | up | cinnamyl-alcohol dehydrogenase     |
| Y_VS_R | alcohol dehydrogenase          | gene-LOC110705193 | 1.119711259 | up | K00002 alcohol dehydrogenase       |
| Y_VS_R |                                | gene-LOC110708308 | 1.448936541 | up | K18857 alcohol dehydrogenase       |
| Y_VS_R |                                | gene-LOC110710556 | 2.246039084 | up | K00008 L-idoitol 2-dehydrogenase   |
| Y_VS_R |                                | gene-LOC110712843 | 2.683189907 | up | K00008 L-idoitol 2-dehydrogenase   |

|        |                   |             |    |                                                                                                                          |
|--------|-------------------|-------------|----|--------------------------------------------------------------------------------------------------------------------------|
| Y_VS_R | gene-LOC110718807 | 1.048278939 | up | K00083<br>cinnamyl-alcohol<br>dehydrogenase                                                                              |
| Y_VS_R | gene-LOC110733075 | 2.381281703 | up | K22395<br>cinnamyl-alcohol<br>dehydrogenase                                                                              |
| Y_VS_R | gene-LOC110735365 | 3.831269208 | up | K00002 alcohol<br>dehydrogenase                                                                                          |
| Y_VS_R | gene-LOC110699057 | 1.839183609 | up | K00121 alcohol<br>dehydrogenase                                                                                          |
| Y_VS_R | gene-LOC110710556 | 4.303312847 | up | K00008 L-iditol<br>2-dehydrogenase                                                                                       |
| Y_VS_R | gene-LOC110712843 | 4.82393127  | up | K00008 L-iditol<br>2-dehydrogenase                                                                                       |
| Y_VS_R | gene-LOC110735199 | 1.66877054  | up | K00083<br>cinnamyl-alcohol<br>dehydrogenase                                                                              |
| Y_VS_R | gene-LOC110682049 | 3.488688792 | up | K00083<br>cinnamyl-alcohol<br>dehydrogenase                                                                              |
| Y_VS_R | gene-LOC110686162 | 2.329274466 | up | K22395<br>cinnamyl-alcohol<br>dehydrogenase<br>[EC:1.1.1.195]  <br>(RefSeq)<br>berberine bridge<br>enzyme-like 15<br>(A) |
| Y_VS_R | gene-LOC110689684 | 1.362246104 | up | K00121 alcohol<br>dehydrogenase                                                                                          |
| Y_VS_R | gene-LOC110699057 | 3.636244473 | up | K00121<br>alcohol<br>dehydrogenase                                                                                       |
| Y_VS_R | gene-LOC110709669 | 6.317766577 | up | K00121<br>alcohol<br>dehydrogenase                                                                                       |
| Y_VS_R | gene-LOC110718574 | 2.020160613 | up | K22395<br>cinnamyl-alcohol<br>dehydrogenase                                                                              |
| Y_VS_R | gene-LOC110721627 | 1.351241739 | up | K00121<br>alcohol<br>dehydrogenase                                                                                       |
| Y_VS_R | gene-LOC110727823 | 2.502017241 | up | K00083<br>cinnamyl-alcohol                                                                                               |

|        |                             |                   |              |      |                   |
|--------|-----------------------------|-------------------|--------------|------|-------------------|
|        |                             |                   |              |      | l dehydrogenase   |
|        |                             |                   |              |      | K00002 alcohol    |
|        |                             |                   |              |      | dehydrogenase     |
|        |                             |                   |              |      | (NADP+)           |
|        |                             |                   |              |      | [EC:1.1.1.2]      |
|        |                             |                   |              |      | (RefSeq)          |
| Y_VS_R |                             | gene-LOC110735365 | 5.256723089  | up   | NADPH-depend      |
|        |                             |                   |              |      | ent aldo-keto     |
|        |                             |                   |              |      | reductase,        |
|        |                             |                   |              |      | chloroplastic-lik |
|        |                             |                   |              |      | e (A)             |
| Y_VS_R |                             | novel.7213        | 1.222906668  | up   | K00844            |
|        | hexokinase                  |                   |              |      | hexokinase        |
| Y_VS_R |                             | novel.5000        | 1.800439413  | up   | K00844            |
|        |                             |                   |              |      | hexokinase        |
| Y_VS_R |                             | gene-LOC110725781 | -3.976529981 | down | K01637            |
|        |                             |                   |              |      | isocitrate lyase  |
| Y_VS_R |                             | gene-LOC110735795 | -4.284403241 | down | K01637            |
|        | hexokinase                  |                   |              |      | isocitrate lyase  |
| Y_VS_R |                             | gene-LOC110725782 | -5.787801482 | down | K01637            |
|        |                             |                   |              |      | isocitrate lyase  |
| Y_VS_R |                             | gene-LOC110735796 | 6.403188413  | up   | K01637            |
|        |                             |                   |              |      | isocitrate lyase  |
|        |                             |                   |              |      | K01602            |
| Y_VS_R |                             | gene-LOC110720402 | 2.352567137  | up   | ribulose-bisphos  |
|        |                             |                   |              |      | phate             |
|        |                             |                   |              |      | carboxylase       |
|        |                             |                   |              |      | small chain       |
|        |                             |                   |              |      | K01602            |
| Y_VS_R |                             | gene-LOC110720403 | 5.712464186  | up   | ribulose-bisphos  |
|        |                             |                   |              |      | phate             |
|        |                             |                   |              |      | carboxylase       |
|        | Ribulose bisphosphate       |                   |              |      | small chain       |
|        | carboxylase small chain     |                   |              |      | K01602            |
| Y_VS_R |                             | gene-LOC110720405 | 2.864711639  | up   | ribulose-bisphos  |
|        |                             |                   |              |      | phate             |
|        |                             |                   |              |      | carboxylase       |
|        |                             |                   |              |      | small chain       |
|        |                             |                   |              |      | K01602            |
| Y_VS_R |                             | gene-LOC110728206 | 6.082795418  | up   | ribulose-bisphos  |
|        |                             |                   |              |      | phate             |
|        |                             |                   |              |      | carboxylase       |
|        |                             |                   |              |      | small chain       |
| Y_VS_R | UDP-sugar pyrophosphorylase | novel.3959        | 8.658161339  | up   | K12447            |

|              |                                                     |                   |             |    |                                                                         |
|--------------|-----------------------------------------------------|-------------------|-------------|----|-------------------------------------------------------------------------|
|              |                                                     |                   |             |    | UDP-sugar<br>pyrophosphoryla<br>se<br>K12447                            |
| Y_VS_R       |                                                     | novel.4763        | 2.415740235 | up | UDP-sugar<br>pyrophosphoryla<br>se<br>K01835                            |
| Y_VS_R       | phosphoacetylglucosamine<br>mutase                  | gene-LOC110729741 | 2.114773024 | up | phosphoglucomu<br>tase<br>K01836                                        |
| Y_VS_R       |                                                     | gene-LOC110732480 | 1.304204785 | up | phosphoacetylgl<br>ucosamine<br>mutase<br>K00927                        |
| W1_VS_<br>W3 | phosphoglycerate kinase                             | gene-LOC110713524 | 2.624255036 | up | phosphoglycerat<br>e kinase<br>K00927                                   |
| Y1_VS_<br>Y4 |                                                     | gene-LOC110721314 | 3.294708741 | up | phosphoglycerat<br>e kinase<br>K00162                                   |
| Y4_VS_<br>R4 | pyruvate dehydrogenase E1<br>component beta subunit | gene-LOC110728546 | 2.312122182 | up | pyruvate<br>dehydrogenase<br>E1 component<br>beta subunit<br>K00615     |
| Y4_VS_<br>R4 |                                                     | gene-LOC110721444 | 2.090774576 | up | transketolase<br>K00873                                                 |
| Y4_VS_<br>B4 | pyruvate dehydrogenase E1<br>component beta subunit | gene-LOC110732515 | 2.208506002 | up | pyruvate kinase<br>K13679                                               |
| Y_VS_B       |                                                     | gene-LOC110722789 | 1.556701588 | up | granule-bound<br>starch synthase<br>K00703 starch<br>synthase<br>K13679 |
| Y_VS_B       | granule-bound starch synthase                       | gene-LOC110730395 | 1.361791392 | up | granule-bound<br>starch synthase<br>K13679                              |
| Y_VS_B       |                                                     | gene-LOC110732328 | 1.129575282 | up | granule-bound<br>starch synthase<br>K13679                              |
| Y_VS_B       |                                                     | gene-LOC110738898 | 2.916723874 | up | granule-bound<br>starch synthase<br>K00703 starch<br>synthase<br>K13679 |
| Y_VS_B       | starch synthase                                     | gene-LOC110687372 | 1.670965318 | up | granule-bound                                                           |
| Y_VS_B       |                                                     | gene-LOC110722789 | 1.556701588 | up |                                                                         |

|        |                   |                   |              |      |                                      |
|--------|-------------------|-------------------|--------------|------|--------------------------------------|
|        |                   |                   |              |      | starch synthase                      |
| Y_VS_B |                   | gene-LOC110730395 | 1.361791392  | up   | K00703 starch synthase               |
| Y_VS_B |                   | gene-LOC110731330 | 1.767628501  | up   | K00703 starch synthase               |
| Y_VS_B |                   | gene-LOC110732328 | 1.129575282  | up   | K13679 granule-bound starch synthase |
| Y_VS_B |                   | gene-LOC110738898 | 2.916723874  | up   | K13679 granule-bound starch synthase |
| Y_VS_B |                   | gene-LOC110683757 | 1.042069007  | up   | K00703 starch synthase               |
| Y_VS_B |                   | gene-LOC110718929 | 2.367146266  | up   | K01176 alpha-amylase                 |
| Y_VS_B | alpha-amylase     | gene-LOC110718424 | -4.576371533 | down | K01176 alpha-amylase                 |
| Y_VS_B |                   | gene-LOC110738785 | -2.48999058  | down | K01176 alpha-amylase                 |
| Y_VS_B |                   | gene-LOC110737712 | -5.024549741 | down | K01176 alpha-amylase                 |
| Y_VS_B |                   | gene-LOC110691952 | -2.650292542 | down | K01177 beta-amylase                  |
| Y_VS_B |                   | gene-LOC110692055 | -5.726130035 | down | K01177 beta-amylase                  |
| Y_VS_B |                   | gene-LOC110730742 | -3.757466597 | down | K01177 beta-amylase                  |
| Y_VS_B |                   | gene-LOC110730910 | -4.328162689 | down | K01177 beta-amylase                  |
| Y_VS_B |                   | gene-LOC110732446 | 1.163339555  | up   | K01177 beta-amylase                  |
| Y_VS_B | beta-amylase      | gene-LOC110691737 | -1.125403941 | down | K01177 beta-amylase                  |
| Y_VS_B |                   | gene-LOC110694254 | 3.663847362  | up   | K01177 beta-amylase                  |
| Y_VS_B |                   | gene-LOC110696059 | 1.621824586  | up   | K01177 beta-amylase                  |
| Y_VS_B |                   | gene-LOC110710941 | 1.673165356  | up   | K01177 beta-amylase                  |
| Y_VS_B |                   | gene-LOC110730263 | 1.9802322    | up   | K01177 beta-amylase                  |
| Y_VS_B |                   | gene-LOC110736249 | 1.108397916  | up   | K01177 beta-amylase                  |
| Y_VS_B | sugar transporter | gene-LOC110685535 | 1.434678131  | up   | K08150 MFS                           |

|        |                   |              |      |                   |
|--------|-------------------|--------------|------|-------------------|
|        |                   |              |      | transporter,      |
|        |                   |              |      | K15382 solute     |
|        |                   |              |      | carrier family 50 |
| Y_VS_B | gene-LOC110706483 | 1.333033756  | up   | (sugar            |
|        |                   |              |      | transporter)      |
| Y_VS_B | gene-LOC110716439 | -2.088430089 | down | K08145 MFS        |
|        |                   |              |      | transporter       |
| Y_VS_B | gene-LOC110720835 | -3.574958524 | down | K15281 solute     |
|        |                   |              |      | carrier family 35 |
|        |                   |              |      | K15382 solute     |
| Y_VS_B | gene-LOC110725786 | 1.247396602  | up   | carrier family 50 |
|        |                   |              |      | (sugar            |
|        |                   |              |      | transporter)      |
|        |                   |              |      | K15382 solute     |
| Y_VS_B | gene-LOC110735791 | 1.710884542  | up   | carrier family 50 |
|        |                   |              |      | (sugar            |
|        |                   |              |      | transporter)      |
|        |                   |              |      | K15382 solute     |
| Y_VS_B | gene-LOC110739666 | 3.987716265  | up   | carrier family 50 |
|        |                   |              |      | (sugar            |
|        |                   |              |      | transporter)      |
| W3_VS_ |                   |              |      | K08150 MFS        |
| W4     | gene-LOC110705141 | 4.174693816  | up   | transporter       |

---
